# Supplementary material for: Electrocatalytic hydrogen production using [FeFe]-hydrogenase mimics based on tetracene derivatives
Source: Royal Society of Chemistry journal article supplement (doi:10.1039/c9nj02790d), 2019-01-01
Supplement: c9nj02790d1.pdf [file c9nj02790d1.pdf]

Supplementary information for

**Electrocatalytic hydrogen production with [FeFe]-Hydrogenase mimics by tetracene derivatives**

Motonori Watanabe,<sup>\*a</sup> Kenta Goto,<sup>b</sup> Takaaki Miyazaki,<sup>c</sup> Masahiko Shibahara,<sup>d</sup>

Yuan Jay Chang,<sup>e</sup> Tashin J. Chow,<sup>e</sup> and Tatsumi Ishihara<sup>a,f</sup>

- a. International Institute for Carbon-Energy Research (I2CNER), Kyushu University, 819-0385, Motooka 744, Nishi-ku, Fukuoka, Japan. [mwata@i2cner.kyushu-u.ac.jp](mailto:mwata@i2cner.kyushu-u.ac.jp)
- b. Institute for Materials Chemistry and Engineering, Kyushu University, 744 Motooka, Nishi-ku, Fukuoka 819-0395, Japan
- c. Department of Chemistry and Biochemistry, Graduate School of Engineering, Kyushu University, 744 Motooka Nishi-ku, Fukuoka 819-0395, Japan
- d. Division of Natural Sciences, Faculty of Science and Technology, Oita University, Dannoharu 700, Oita, Japan.
- e. Department of Chemistry, Tunghai University, Taichung 40704, Taiwan
- f. Department of Applied Chemistry, Faculty of Engineering, Kyushu University, Nishi-ku, Fukuoka 819-0395, Japan

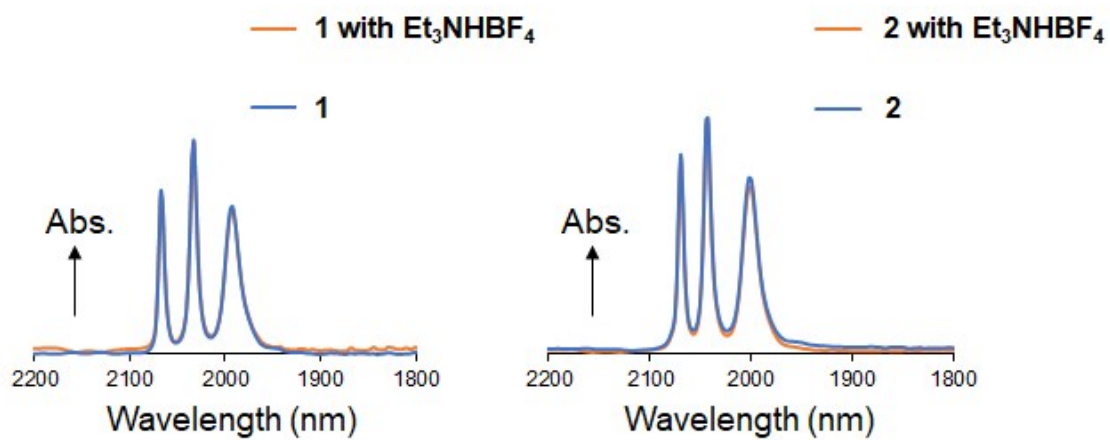

Figure S1. (left) IR spectra of **1** (1 mM) and **1** (1 mM) with 25 mM  $\text{Et}_3\text{NHBF}_4$  and 0.1 M  $\text{nBu}_4\text{NPF}_6$  in  $\text{CH}_2\text{Cl}_2$  solution, and (right) **2** (1 mM) and **2** (1 mM) with 25 mM  $\text{Et}_3\text{NHBF}_4$  and 0.1 M  $\text{nBu}_4\text{NPF}_6$  in  $\text{CH}_2\text{Cl}_2$  solution.

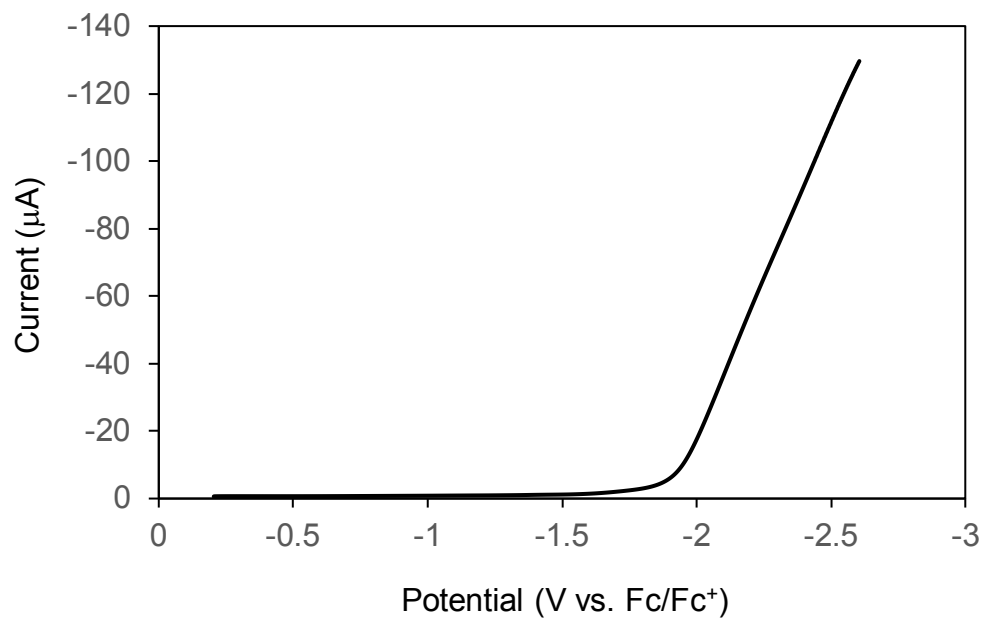

Figure S2. Cyclic voltammetry of 25 mM  $\text{Et}_3\text{NHBF}_4$  in  $\text{CH}_2\text{Cl}_2$  solution with 0.1 M  $\text{nBu}_4\text{NPF}_6$  electrolyte.

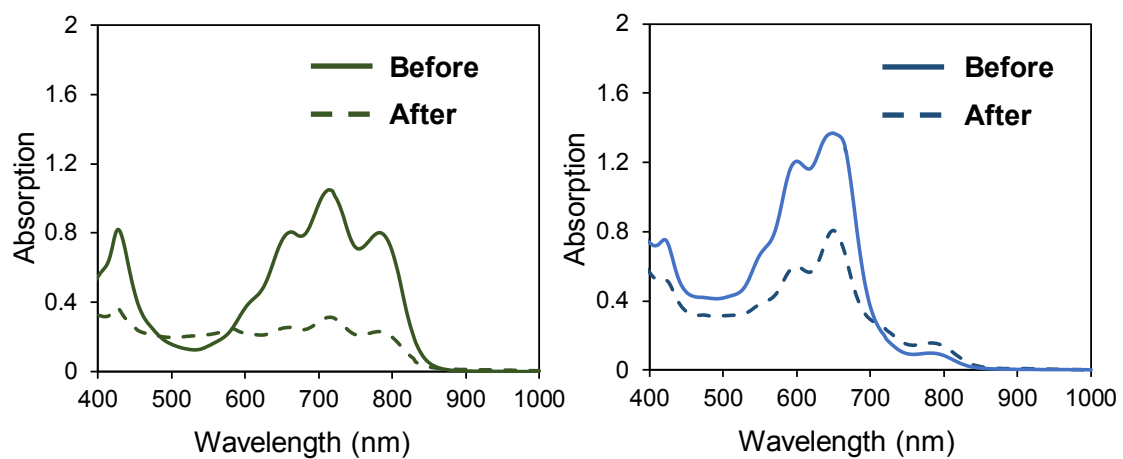

Figure S3. Absorption spectra of before and after bulk electrolysis of complexes (1 mM) with 25 mM  $\text{Et}_3\text{NHBF}_4$  and 0.1 M  $\text{nBu}_4\text{NPF}_6$  in  $\text{CH}_2\text{Cl}_2$  solution. (left) **1**, and (right) **2**.

Table S1. Summary of crystallographic data and refinement details of **1** and **2**

|                            | <b>1</b>                 | <b>2</b>                 |
|----------------------------|--------------------------|--------------------------|
| Empirical formula          | $C_{27}H_{11}Fe_2O_6S_4$ | $C_{30}H_8Fe_4O_{12}S_4$ |
| Mw                         | 671.31                   | 912.01                   |
| Crystal color and Habit    | Green, Prism             | Blue, Platelet           |
| Crystal size [mm]          | 0.20 x 0.16 x 0.04       | 0.20 x 0.20 x 0.20       |
| Crystal system             | Monoclinic               | Monoclinic               |
| Space group                | C2/c (#15)               | C2 <sub>1</sub> /c (#14) |
| Temperature [oC]           | -150                     | -150                     |
| a [Å]                      | 36.212(12)               | 12.232(5)                |
| b [Å]                      | 7.359(2)                 | 9.726(4)                 |
| c [Å]                      | 21.219(7)                | 13.980(5)                |
| β [o]                      | 113.185(6)               | 107.386(9)               |
| V [Å <sup>3</sup> ]        | 5198(3)                  | 15187.1(11)              |
| Z                          | 8                        | 2                        |
| Dcalc [g/cm <sup>2</sup> ] | 1.716                    | 1.908                    |
| F (000)                    | 2696.00                  | 904.00                   |
| μ [cm <sup>-1</sup> ]      | 14.793                   | 21.186                   |
| 2θmax                      | 55.0                     | 55.0                     |
| No. of reflections         | 23234                    | 9852                     |
| Measured                   | 5924                     | 3560                     |
| Rint                       | 0.0491                   | 0.0425                   |
| No. of observations        | 5924                     | 3560                     |
| No of parameters           | 379                      | 226                      |
| R1 [ >2σ(I)]               | 0.0444                   | 0.0465                   |
| wR2 [all data]             | 0.1043                   | 0.0926                   |
| GOF                        | 1.194                    | 1.129                    |
